# Supplementary material for: Optoelectronic Dual Mode Encryption for High Security Biometric Identification
Source: Research Square preprint supplement (doi:10.21203/rs.3.rs-6653901/v1), 2025-05-29
Supplement: Supplementary file 1 [file e7adcf33b32bb59bf750f60e.docx]

**Supplementary information**

**Optoelectronic Dual Mode Encryption for High Security Biometric Identification**

Yuxiao Zhang a, Yue Liu a,*, Juan Tao e, Yepei Mo c, Yuke Deng a, Jiahui Tong e, Rongrong Bao c, Jianbei Qiu a,b, Ji Zhou b,d,*, Caofeng Pan c,*, Zhengwen Yang a,b,*

a College of Materials Science and Engineering, Kunming University of Science and Technology, Kunming, 650093, China.

b Southwest United Graduate School, Kunming, 650093, China.

c Institute of Atomic Manufacturing, Beihang University, Beijing 100191, P. R. China.

d School of Materials Science and Engineering, State Key Lab of New Ceramics and Fine Processing, Tsinghua University, Beijing 100084, China.

e Jiashan Fudan Institute, Jiaxing, Zhejiang Province 314100, China.

*Corresponding Author E-mails: [yangzw@kmust.edu.cn](mailto:yangzw@kmust.edu.cn); [pancaofeng@buaa.edu.cn](mailto:pancaofeng@buaa.edu.cn); [zhouji@tsinghua.edu.cn](mailto:zhouji@tsinghua.edu.cn); [liuyue2023@kust.edu.cn](mailto:liuyue2023@kust.edu.cn).

**
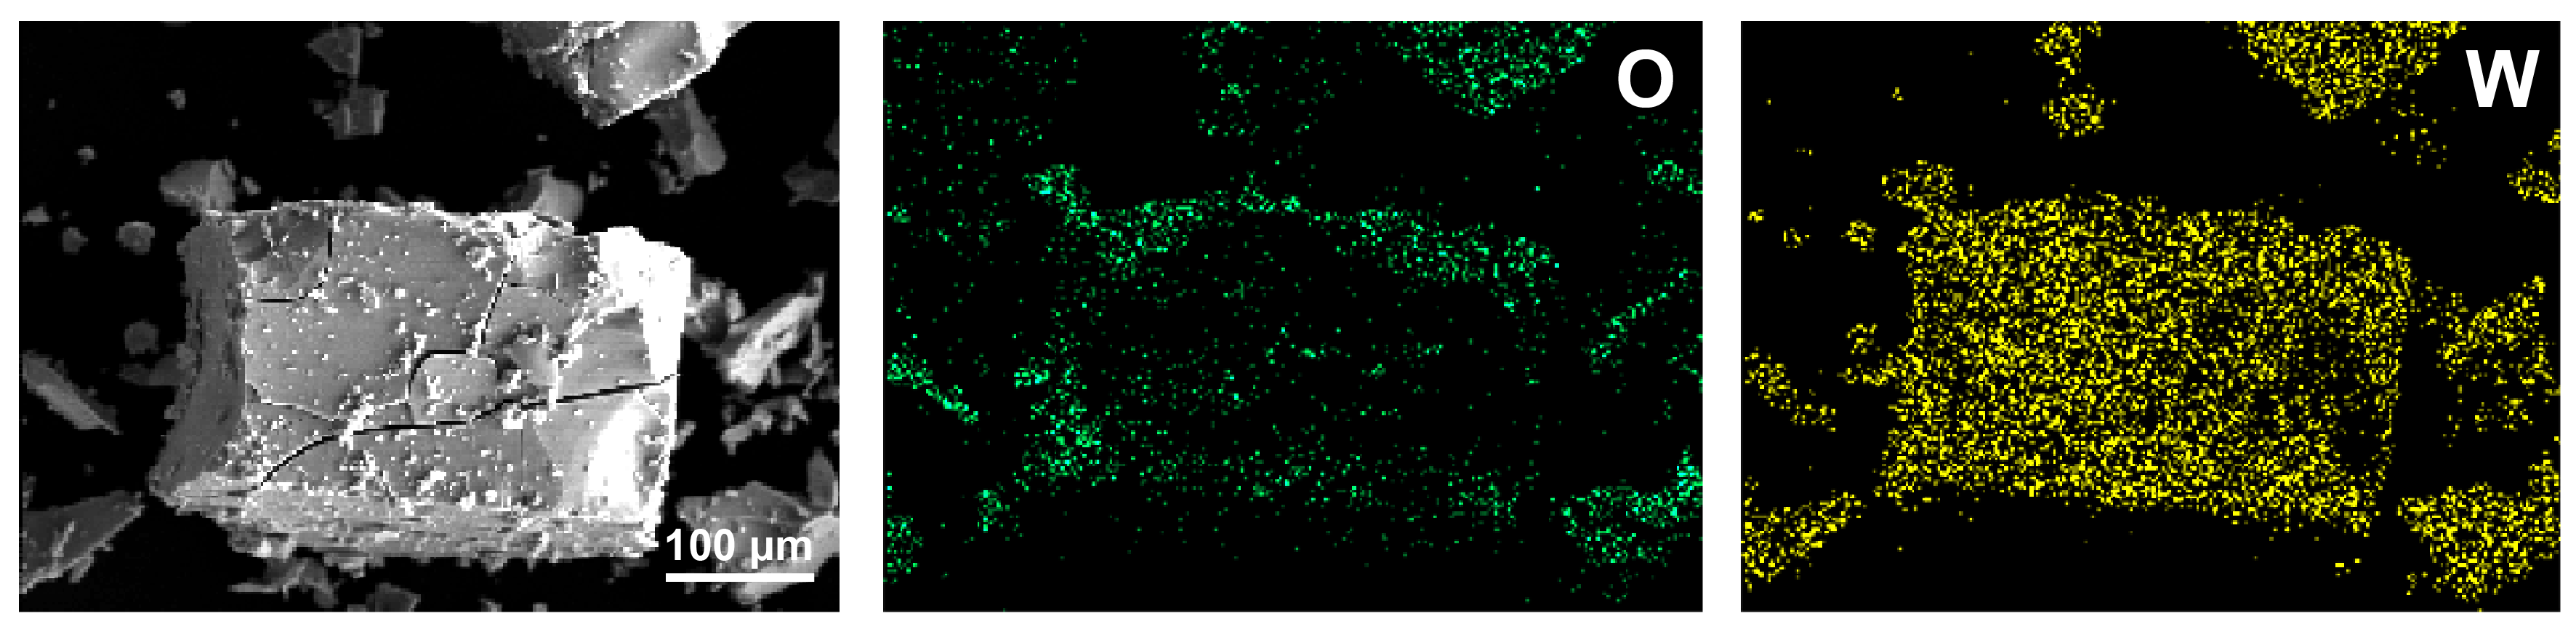
**

**Supplementary Figure 1. Internal morphological characteristics and elemental distribution of the WO3 precursor.**

**
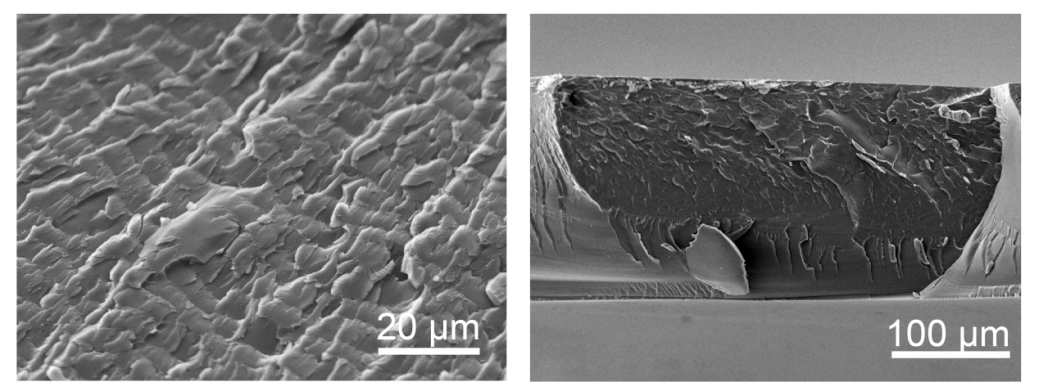
**

**Supplementary Figure 2. Surface morphological characteristics of the lyophilized PAAm-LiCl hydrogel.**


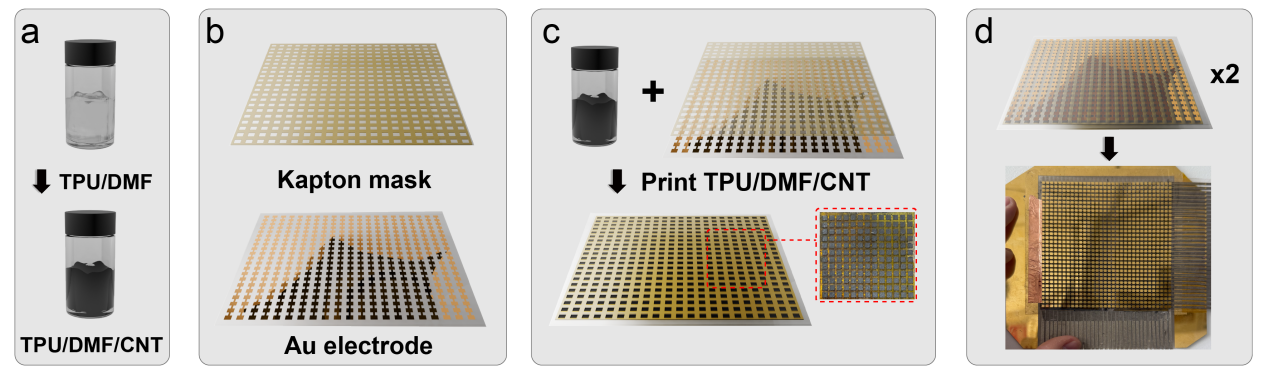


**Supplementary Figure 3. Schematic diagram of the preparation process of resistive pressure sensing array.**

**
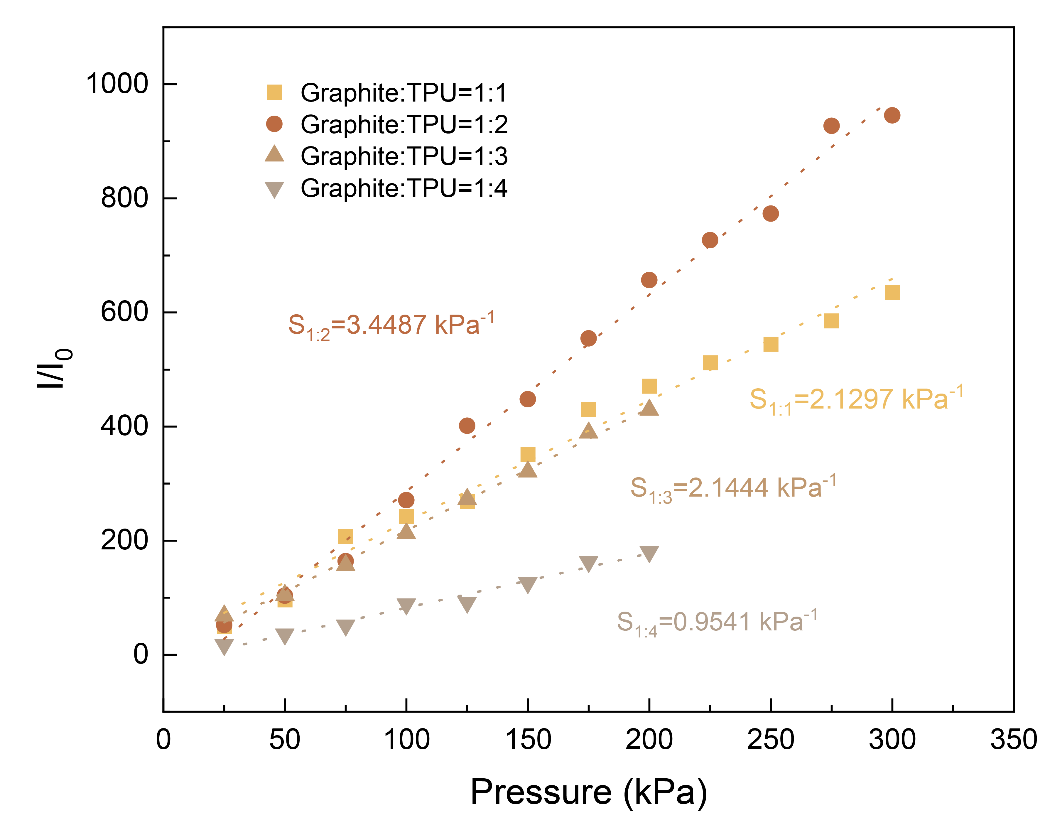
**

**Supplementary Figure 4. Performance comparison of pressure-sensitive layer materials with different doping ratios.**

**
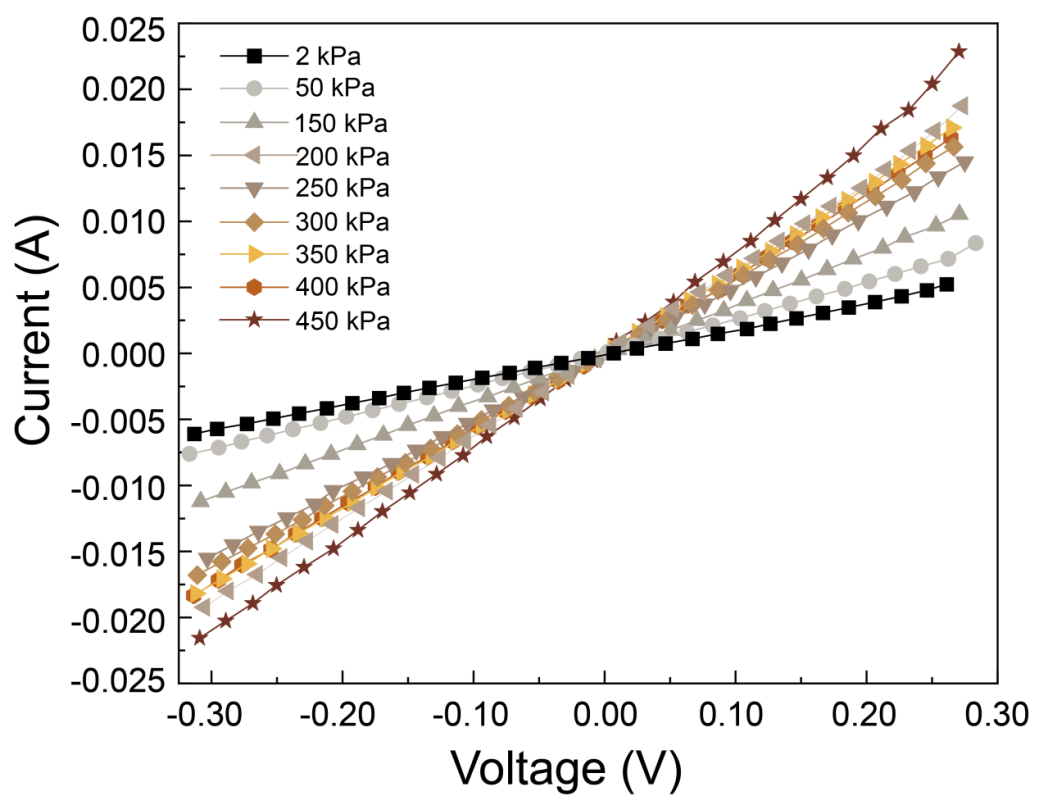
**

**Supplementary Figure 5. Current-voltage variations of the individual sensing unit under varying applied pressures.**

**
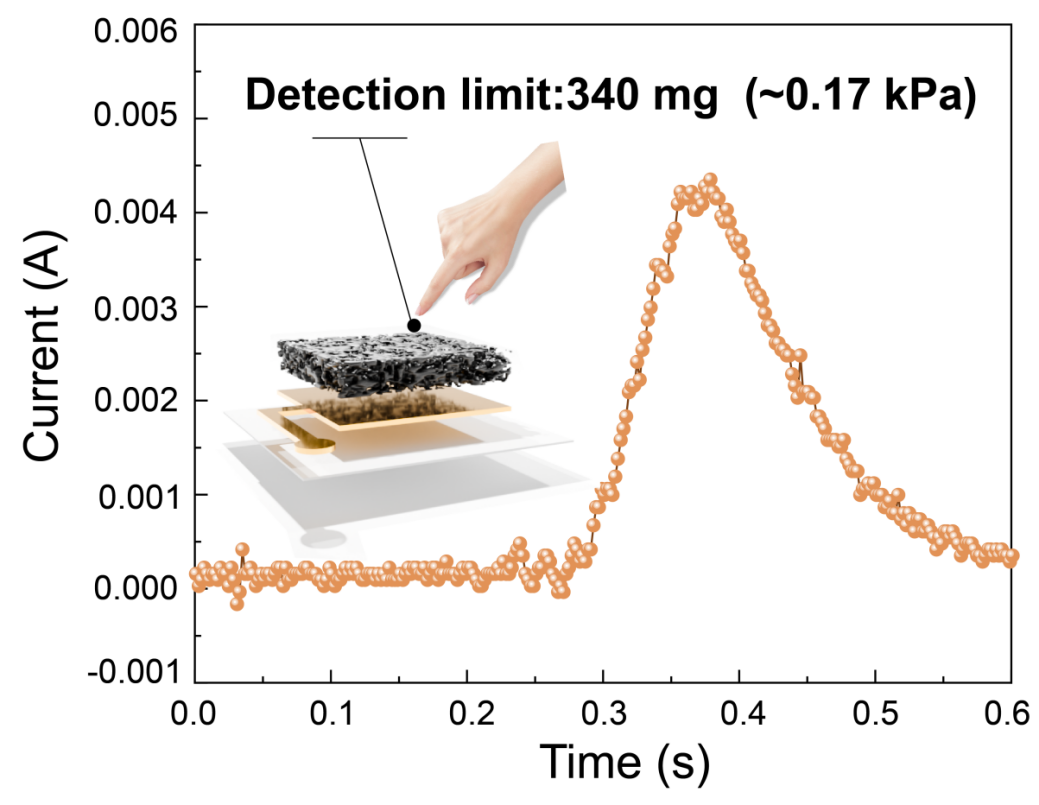
**

**Supplementary Figure 6. Response threshold characterization of the individual sensing unit.**minimum detectable mass: 340 mg (0.17 kPa).


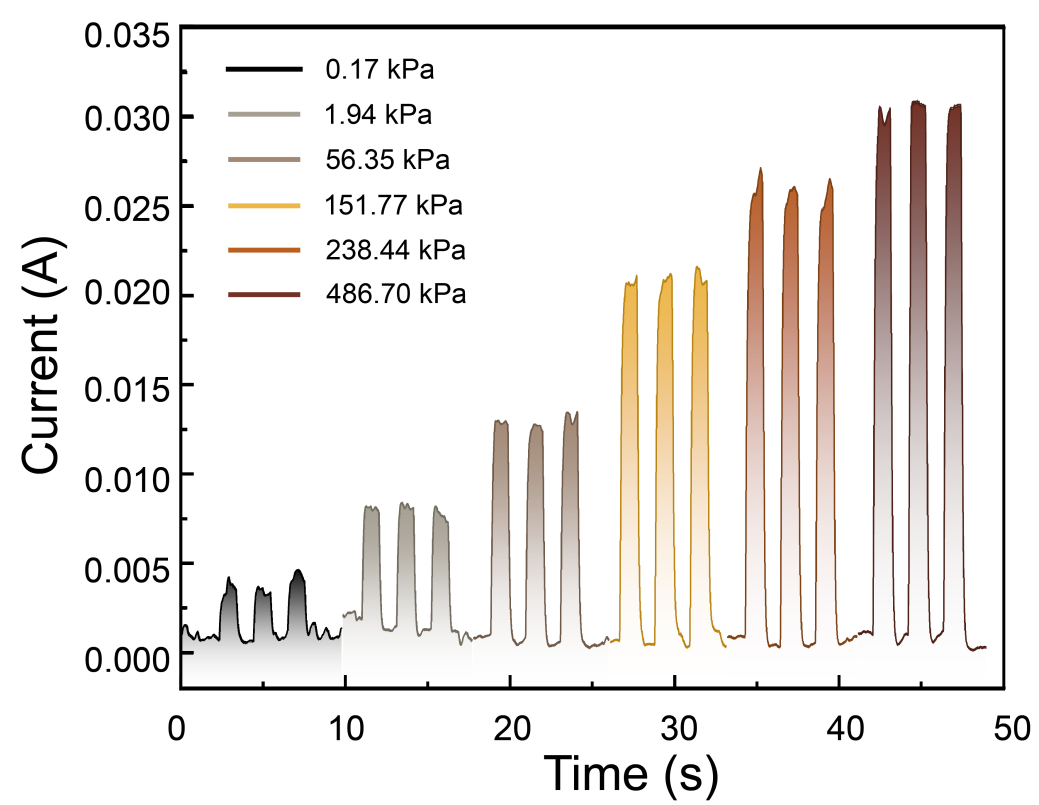


**Supplementary Figure 7. Dynamic response characterization of the individual sensing unit.**Experimental findings reveal stable real-time response characteristics spanning from 0.17 to 486 kPa,validating effective pressure transduction across broad pressure regimes.


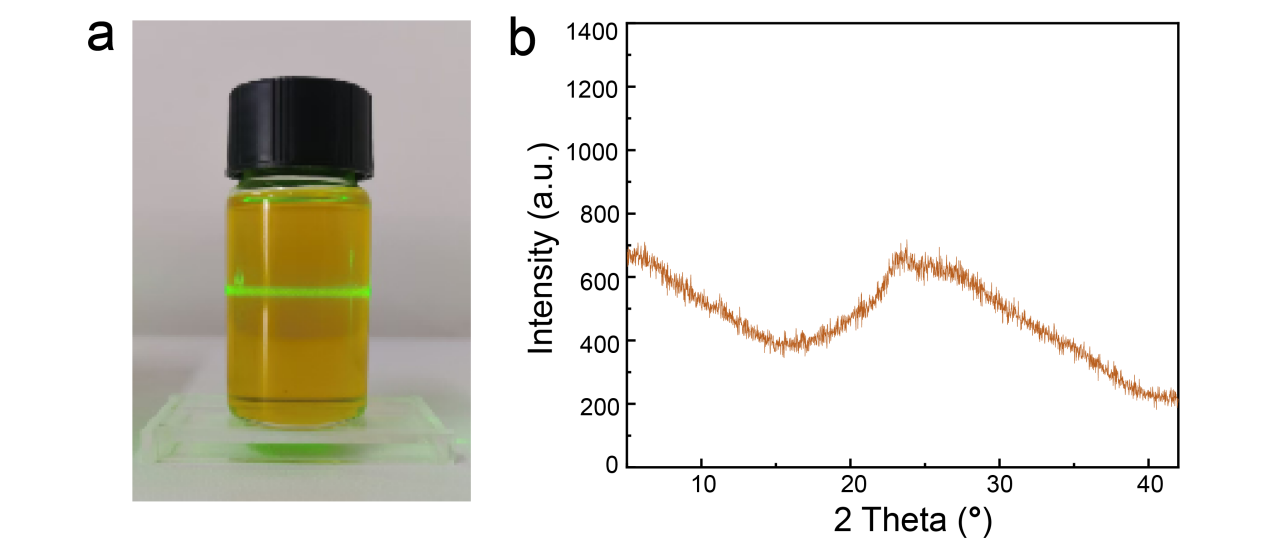


**Supplementary Figure 8. Liquid functional layer basic characterization.** (a) Colloidal state of liquid functional layer. (b) XRD analysis of the liquid functional layer shows that the interior is composed of amorphous particles.

**
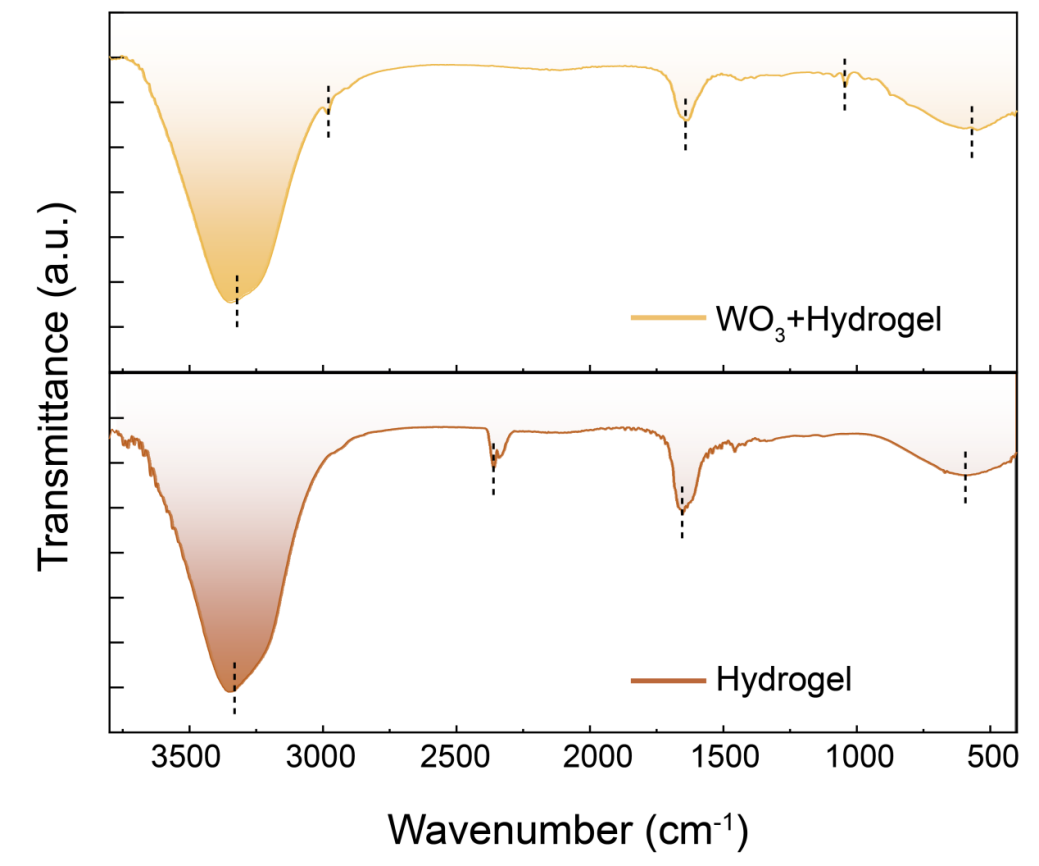
**

**Supplementary Figure 9. Comparative FTIR analysis of hybrid ink formulation (upper) and PAAm-LiCl hydrogel (lower).**FTIR analysis of the hybrid ink (upper) and PAAm-LiCl hydrogel (lower) demonstrated that both systems exhibited prominent O-H stretching vibrations in the 3200-3400 cm-1 range, while a weak Li+-associated vibration emerged at 2300 cm-1 in the hydrogel spectrum. Incorporation of WO3 perturbed the original vibrational modes, though both materials retained characteristic C=O stretching vibrations of amide groups near 1600 cm-1. Distinctive W-O stretching vibrations at 1038 cm-1 and potential W-O bending vibrations within 500-700 cm-1 were exclusively observed in the hybrid ink, whereas Li-O vibrational signatures around 570 cm-1 were common to both systems, confirming interfacial interactions and structural modifications.

**
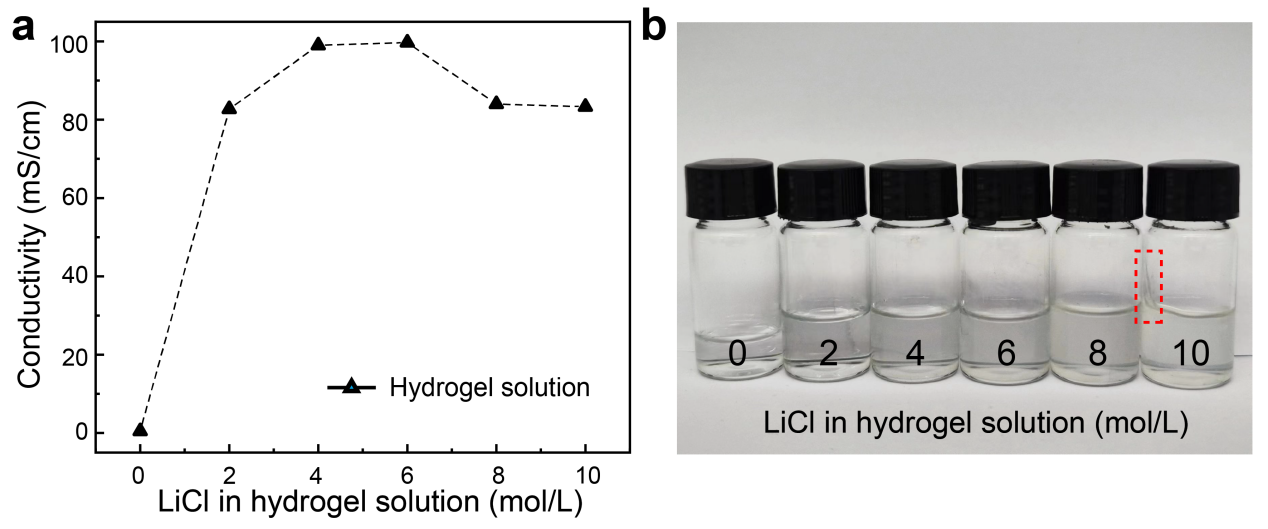
**

**Supplementary Figure 10. Hydrogel solutions doped with varying concentrations of LiCl.** (a) Conductivity tests revealed a gradual increase in electrical conductivity with rising LiCl concentration, peaking at 6 mol/L. (b) Observations of hydrogel solution states across concentrations demonstrated significant wall-adhering phenomena at 10 mol/L LiCl.


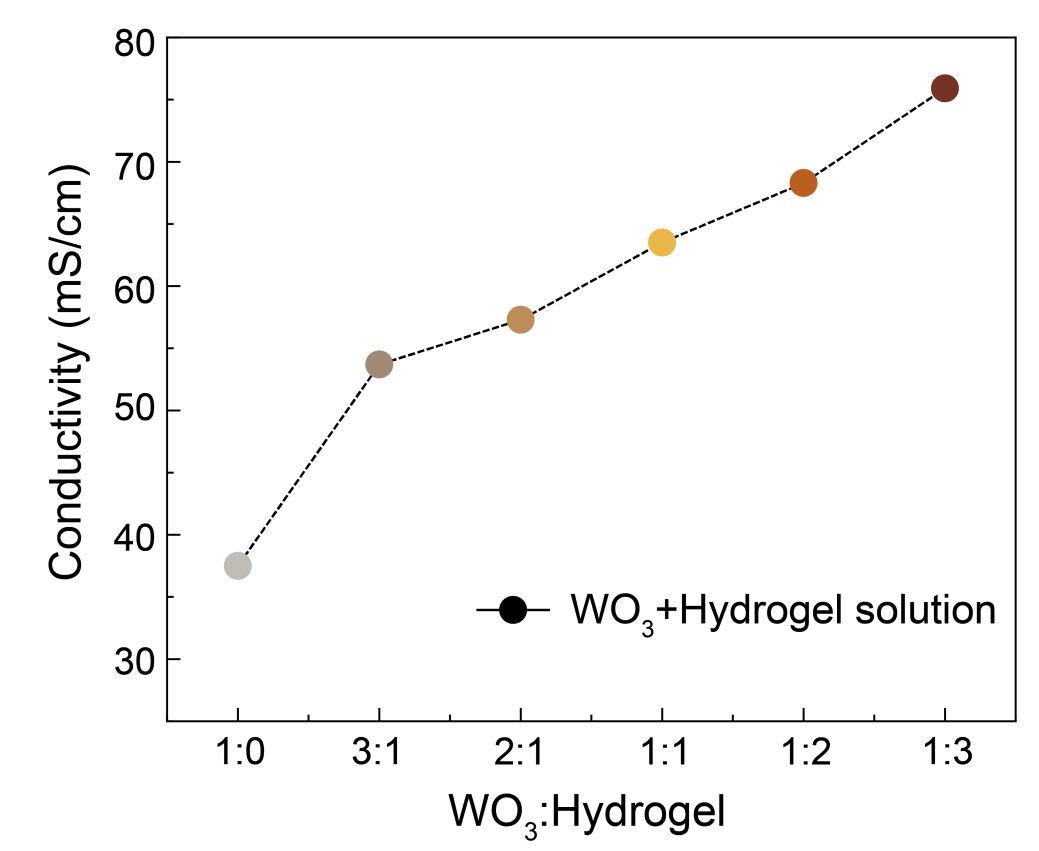


**Supplementary Figure 11. Conductivity characterization of electrochromic inks with varying concentrations was conducted.** A progressive enhancement in electrical conductivity was observed with increasing hydrogel content.

**
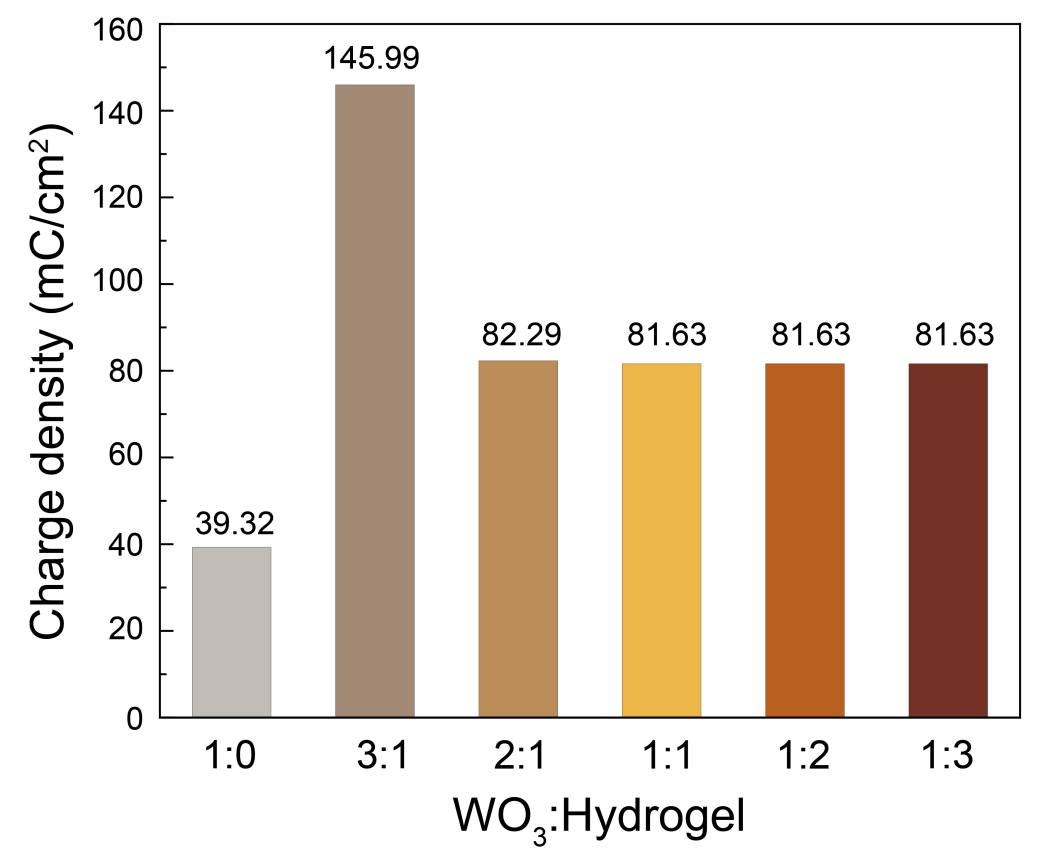
**

**Supplementary Figure 12. Charge density of electrochromic inks with varying concentrations.**

**
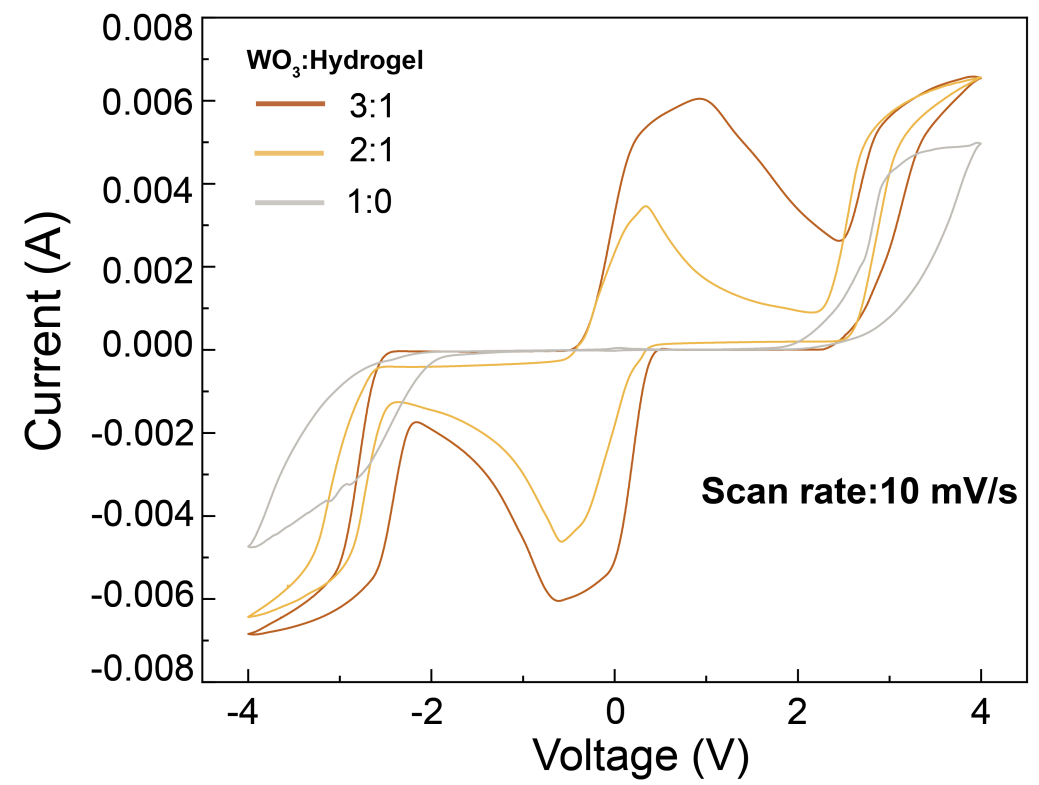
**

**Supplementary Figure 13. Cyclic voltammetry profiles of hybrid ink formulations with varying concentrations.**

**
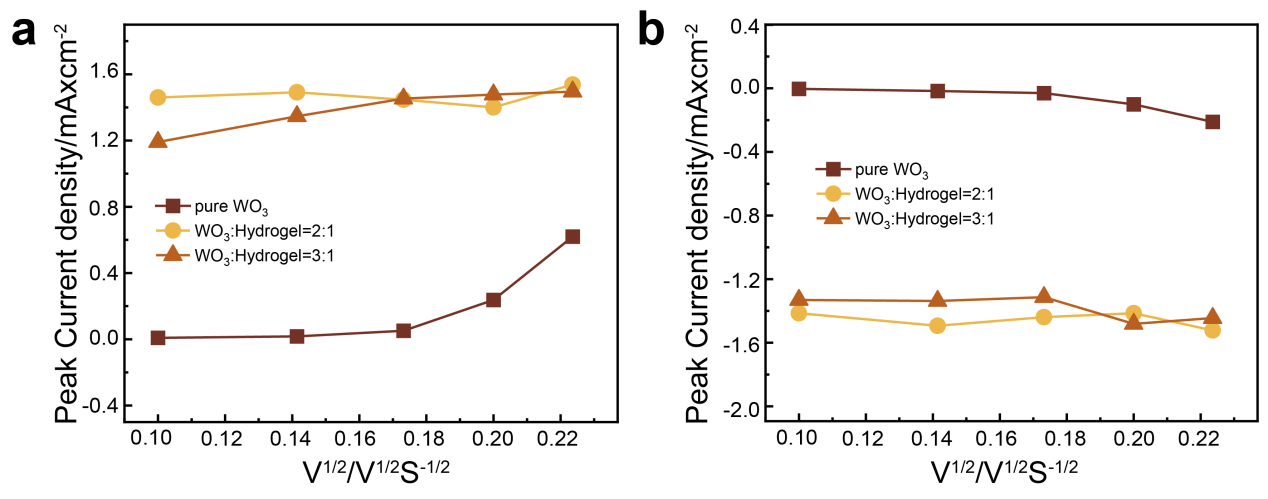
**

**Supplementary Figure 14. Peak current density versus square root of scan rate for hybrid ink formulations with varying concentrations in the oxidized state (left) and reduced state (right).**

**
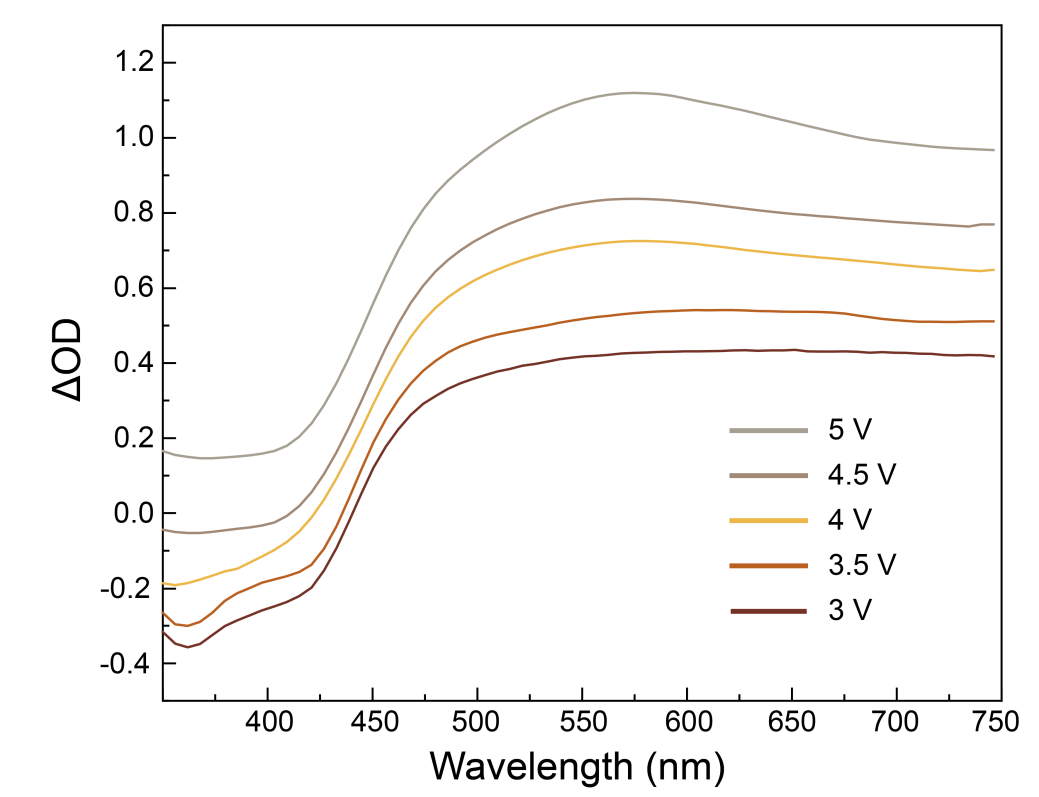
**

**Supplementary Figure 15. Optical density variations of the hybrid electrochromic ink formulation (WO3-to-hydrogel mass ratio 3:1) under varying applied voltages.**

**
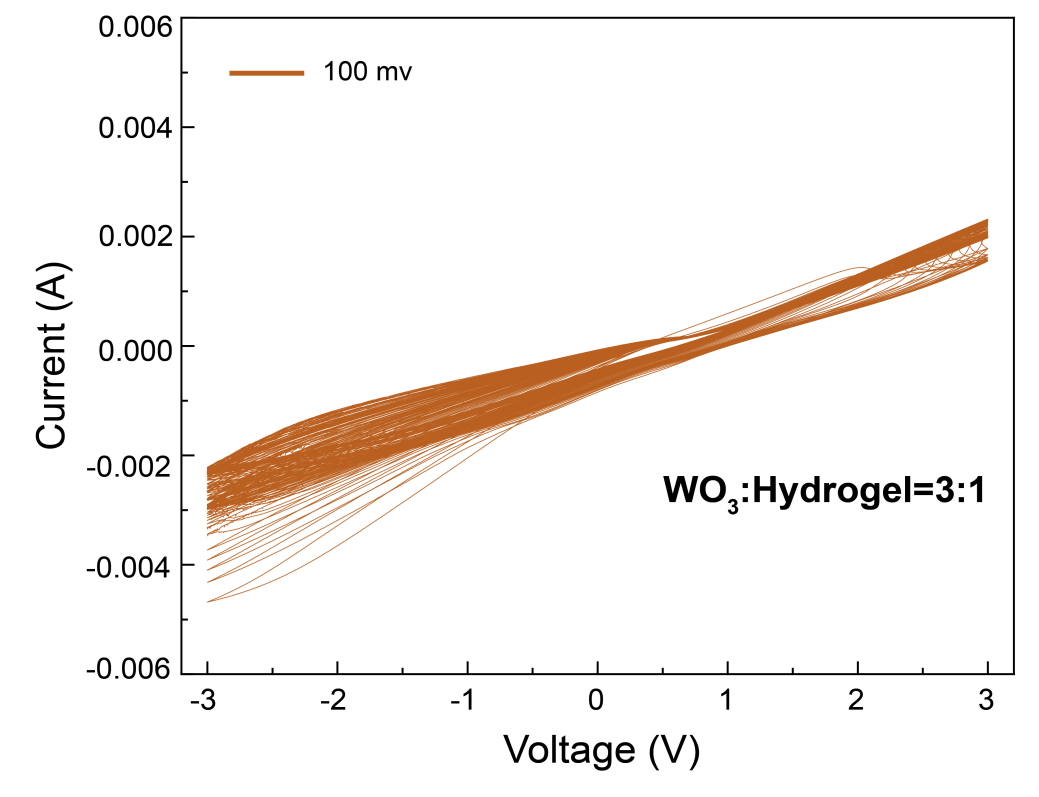
**

**Supplementary Figure 16. Cyclic voltammetry (CV) cycling tests (latter 40 cycles).**

**
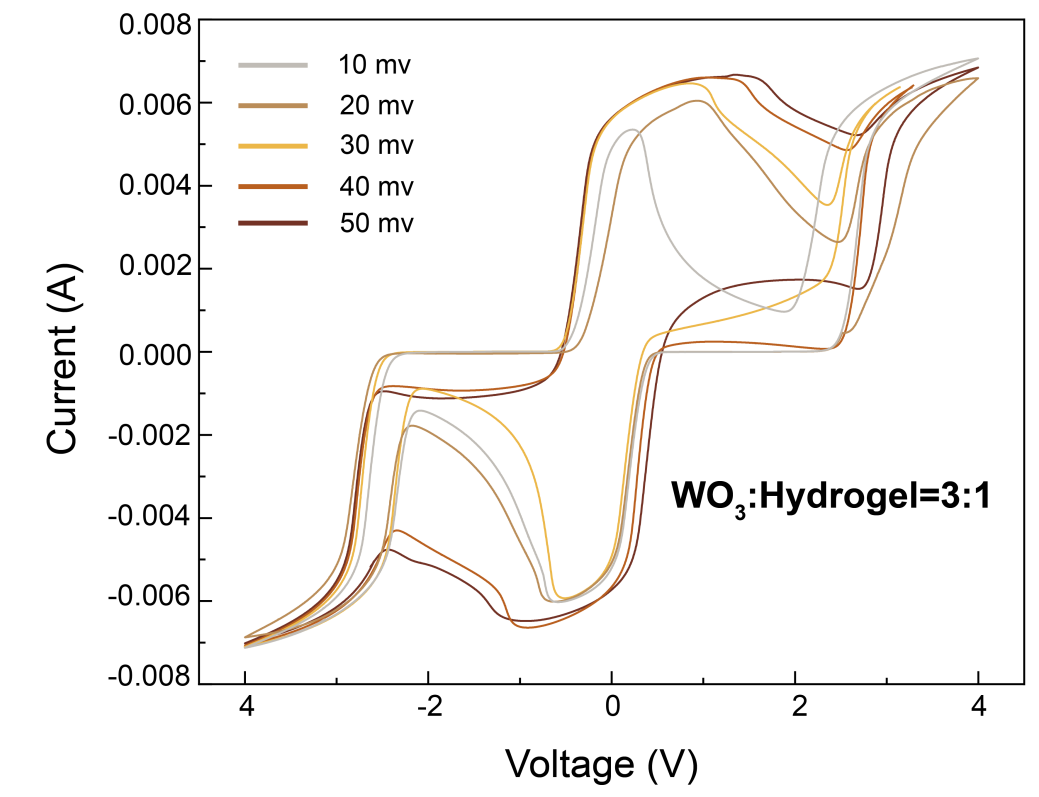
**

**Supplementary Figure 17. Cyclic voltammetry (CV) profiles of the hybrid electrochromic ink formulation with a WO3-to-hydrogel mass ratio of 3:1 at varying scan rates.**

**
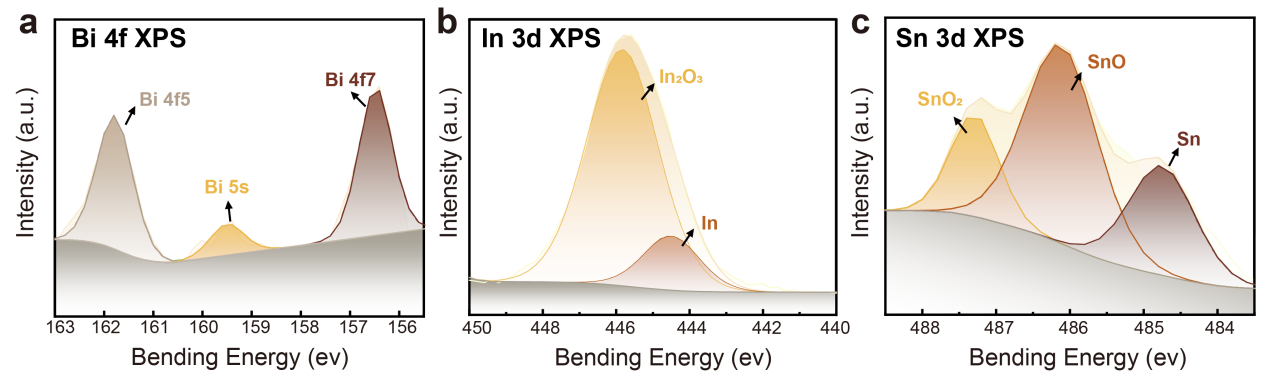
**

**Supplementary Figure 18. XPS surface analysis of liquid metal.** (a) Bi, (b) In,(c) Sn.


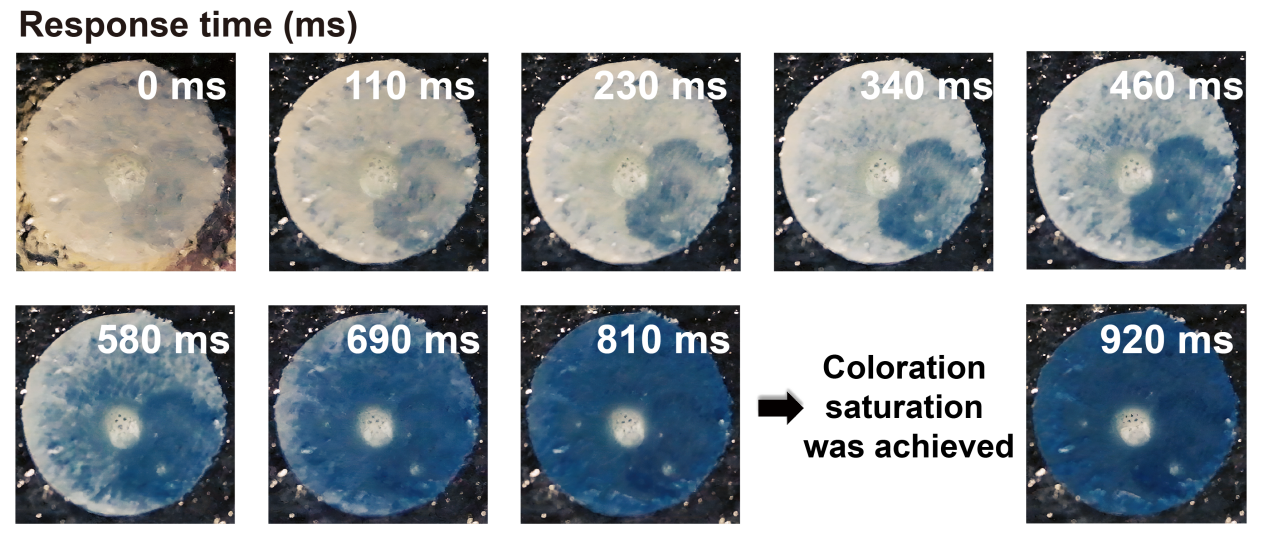


**Supplementary Figure 19.The total response time of the liquid functional layer on the liquid metal was measured.** No significant difference in coloration state was observed between 810 ms and 920 ms, indicating that the liquid functional layer had reached its fully colored state by 810 ms​​.


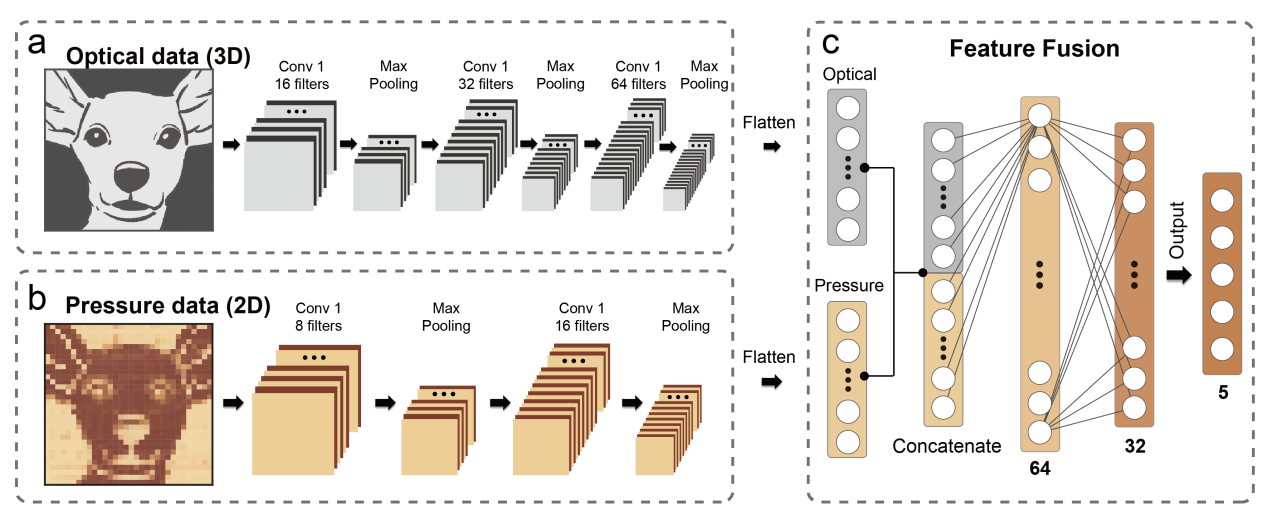


**Supplementary Figure 20. Schematic diagram of the machine learning process for optical bimodal signals.** (a) 2D convolutional network machine learning process for optical signals. (b) 3D convolutional network machine learning process for electrical signals. (c) Bimodal signal feature-level fusion machine learning process.

**
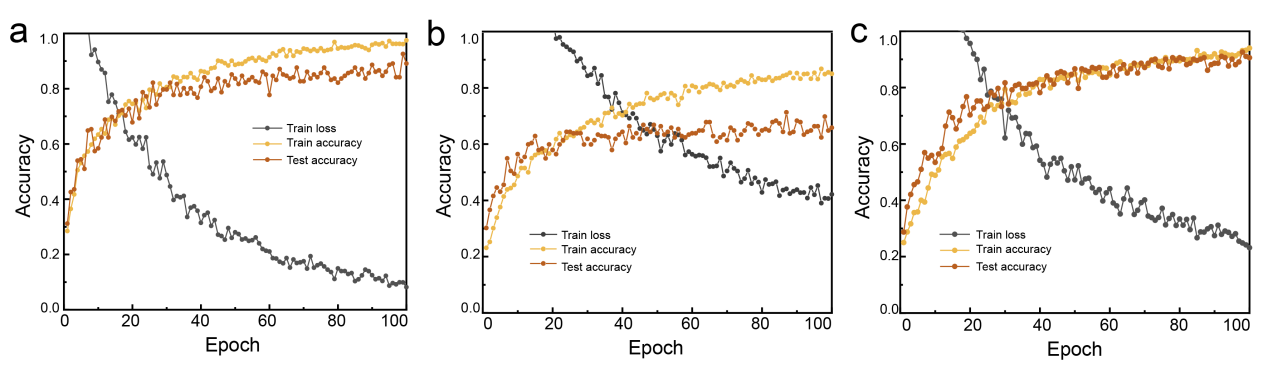
**

**Supplementary Figure 21. Demonstration of the Learning Process for Optical Information, Pressure Mapping, and Feature-Level Fusion.** (a) Optical Data. (b) Pressure Data. (c) Feature-Level Fusion.
